# Supplementary material for: Construction of an Electrocardiogram Database Including 12 Lead Waveforms
Source: PubMed Central journal article supplement — Healthc Inform Res. 2018 Jul 31;24(3):242–6. doi: 10.4258/hir.2018.24.3.242 (PMC6085199; doi:10.4258/hir.2018.24.3.242), 2018-07-31
Supplement: hir-24-242-s001.pdf [file hir-24-242-s001.pdf]

### Software for extracting information from an ECG report of PDF format

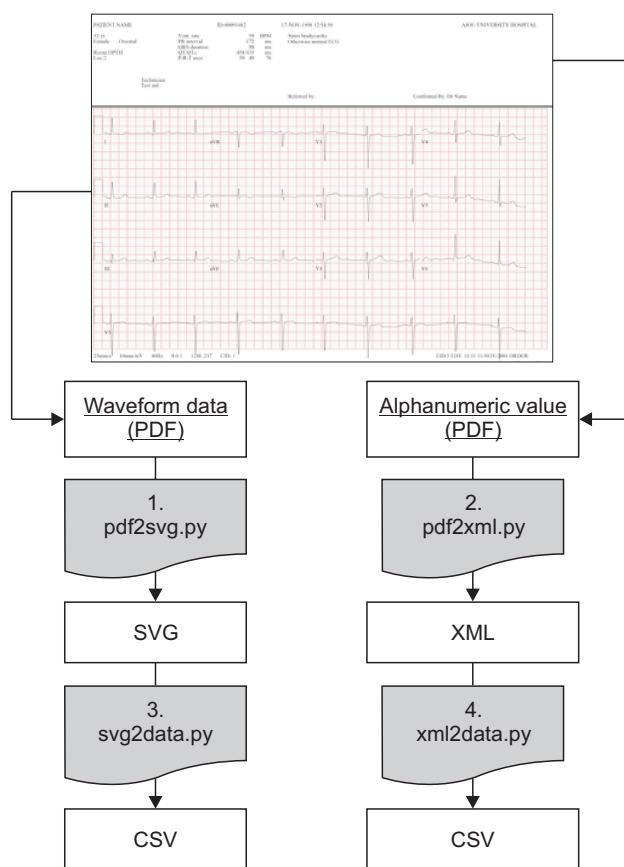

Figure 1. A flow chart for the Python code.

## 1. pdf2svg.py

A code that converts a PDF file into a SVG file.

Input: The folder where the PDF file is located. A list of all the files in that folder will be inputted into the execute function.

Output: Folder where converted SVG files will be stored. The SVG file will be created in that folder.

Because multiprocessing is used, the speed may vary depending on your CPU configuration.

```
###This code is for converting PDF file to SVG file.

##import library for converting ##
from multiprocessing import Process
from multiprocessing import Pool, cpu_count
from os import listdir
import time
import os

## execute function for converting ##
def execute(filelist):
    os.chdir("/directory/pdf")
    command = "inkscape -z -f /directory/pdf/"+filelist+" -l /directory/svg/"+filelist+".svg"
    os.system(command)
    os.chdir("/directory/pdf")
    # directory is the physical directory where the file is located

if __name__ == '__main__':
    print("Start convert ECG data!")

    os.chdir("/directory/")
    search_directory = "pdf"
    filelist = listdir(search_directory)

    processor = cpu_count()
    proc = os.getpid()

    print("proc_id",proc)
    print(os.fork())
    print("Number of processor:",processor)

    print("Number_of_pdf_file :", len(filelist))

    pool = Pool(processes = cpu_count())

    startTime = int(time.time())
    print(startTime)
    pool.map(execute, filelist)
    endTime = int(time.time())
    print("Total converting time", (endTime - startTime))
```

## 2. pdf2xml.py

A code that converts a PDF file into an XML file.

Input: The folder where the PDF file is located. A list of all the files in that folder will be inputted into the execute function.

Output: Folder where converted XML files will be stored. The XML file will be created in that folder.

Because multiprocessing is used, the speed may vary depending on your CPU configuration.

```
###This code is for converting PDF to XML

##import library for converting ##
from multiprocessing import Process
from multiprocessing import Pool, cpu_count
from os import listdir
import time
import os

## execute function for converting ##
def execute(filelist):
    os.chdir("/directory/pdf")
    command = "pdftohtml -xml /directory/pdf/"+filelist+" /directory/xml/"+filelist+".xml"
    os.system(command)
    os.chdir("/directory/pdf")
    # directory is the physical directory where the file is located

if __name__ == '__main__':
    print("Start convert ECG data!")

    os.chdir("/directory/")
    search_directory = "pdf"
    filelist = listdir(search_directory)

    processor = cpu_count()
    proc = os.getpid()

    print("proc_id",proc)
    print(os.fork())
    print("Number of processor:",processor)

    print("Number_of_pdf_file :", len(filelist))

    pool = Pool(processes = cpu_count())

    startTime = int(time.time())
    print(startTime)
    pool.map(execute, filelist)
    endTime = int(time.time())
    print("Total converting time", (endTime - startTime))
```

### 3. svg2data.py

A code converts an SVG file into a CSV file containing the waveform data.

Input: SVG file.

This code includes the following functions: (1) extract the waveform data by parsing the SVG file, (2) change the coordinates to Cartesian coordinates, (3) adjust the baseline and scale, and (4) linear interpolation

Because multiprocessing is used, the speed may vary depending on your CPU configuration.

```
### This code is for converting SVG to data(waveform)
```

```
## Module import (for parsing and multiprocessing)
```

```
from multiprocessing import Process
```

```
from multiprocessing import Pool, cpu_count
```

```
from svgpathtools import svg2paths2
```

```
from svgpathtools import wsvg
```

```
from os import listdir
```

```
import matplotlib.pyplot as plt
```

```
import scipy.interpolate
```

```
import scipy as sp
```

```
import pandas as pd
```

```
import numpy as np
```

```
import cmath
```

```
import os
```

```
import sys
```

```
import re
```

```
import hashlib
```

```
import time
```

```
### Define functions for converting
```

```
def pol2cart(polar):
```

```
    rho = polar[0]
```

```
    phi = polar[1]
```

```
    x = rho * np.cos(phi)
```

```
    y = rho * np.sin(phi)
```

```
    return(x, y)
```

```
def pars_info(file):
```

```
    paths, attributes, svg_attributes = svg2paths2(file)
```

```
    pth_tmp = paths[411:]
```

```
    return pth_tmp
```

```
def chang_corrd(pth_tmp):
```

```
    lst_tmp = []
```

```
    n = 0
```

```
    for i in pth_tmp:
```

```
        #print(i)
```

```
        path_tmp = [pth_tmp[n][0::2]]
```

```

lst_tmp = lst_tmp + path_tmp
n = n + 1
path_tmp = []

return lst_tmp

def corrd2data(lst_tmp):
    x_list = []
    y_list = []
    n = 0
    for i in lst_tmp:
        x = []
        y = []
        for i[n] in i:

            #[0] is first part!
            real_num_s = i[n][0].real
            imag_num_s = i[n][0].imag

            #[1] is end part!
            real_num_e = i[n][1].real
            imag_num_e = i[n][1].imag

            #convert to complex number!
            start_cn = complex(real_num_s , imag_num_s)
            end_cn = complex(real_num_e, imag_num_e)

            #convert to polar coordinates!
            start_pol = cmath.polar(start_cn)
            end_pol = cmath.polar(end_cn)

            #convert to cartesian coordinate!
            start_poi = pol2cart(start_pol)
            end_poi = pol2cart(end_pol)

            start_poi_x = [start_poi[0]]
            end_poi_x = [end_poi[0]]
            start_poi_y = [start_poi[1]]
            end_poi_y = [end_poi[1]]

            #collect!
            x = x + start_poi_x + end_poi_x
            start_poi_x = []
            end_poi_x = []

            y = y + start_poi_y + end_poi_y
            start_poi_y = []
            end_poi_y = []

```

```

    x_list.append(x[2:])
    y_list.append(y[2:])

return x_list, y_list

####Convert file name for DB
# 1)Parsing patient ID from name of pdf file and anonymous!
def gt_id(name):
    p_id = re.findall('ID=\d+',name)
    p_id = ".join(p_id).replace("=", "")
    hashSHA = hashlib.sha256()
    hashSHA.update(p_id)
    hexSHA256 = hashSHA.hexdigest()
    p_id= hexSHA256[0:20]

    return p_id

# 2)Parsing date from file name
def gt_date(name):
    date = re.findall('Date=\d+-\d+-\d+',name)
    date = ".join(date).replace('Date=', '').split("-")
    date[0],date[1],date[2] = date[2],date[1],date[0]
    date = ".join(date)

    return date

# 3)Parsing time and merge with date for filename
def gt_time(name):
    time = re.findall('Time=\d+%\d+\w+%\d+\w\d+',name)
    time = ".join(time)
    time = time.replace("Time=", "").replace('%3a',"")

    return time

# 4)Parsing end number from file name
def gt_endnum(name):
    endnum = re.findall('num\d+',name)
    endnum = ".join(endnum)

    return endnum

### change Hz of ECG data!(500Hz/s)
def inter(x_list,y_list):
    #ytmp = [float(i) for i in y_list]
    #xtmp = [float(i) for i in x_list]
    y_array = np.array(y_list)
    x_array = np.array(x_list)

```

```

new_length = 1500
new_x = np.linspace(x_array.min(), x_array.max(),new_length)
new_y = sp.interpolate.interp1d(x_array,y_array)(new_x)
x_list = new_x.tolist()
y_list = new_y.tolist()

return x_list, y_list

def inter2(x_list,y_list):
    #ytmp = [float(i) for i in y_list]
    #xtmp = [float(i) for i in x_list]
    y_array = np.array(y_list)
    x_array = np.array(x_list)
    new_length = 5000
    new_x = np.linspace(x_array.min(), x_array.max(),new_length)
    new_y = sp.interpolate.interp1d(x_array,y_array)(new_x)
    x_list = new_x.tolist()
    y_list = new_y.tolist()

    return x_list, y_list

### fixing data to fit baseline of ECG!
def fix_data(x_list, y_list):
    ## calculate final y value of baseline!
    f_bl = y_list[0][-1]
    s_bl = y_list[1][-1]
    t_bl = y_list[2][-1]
    fr_bl = y_list[15][-1]

    ## first, fix y value of first row!
    dis_fn3 = f_bl - y_list[3][0]
    if dis_fn3 > 0:
        y_list[3] = list(map(lambda y: y + dis_fn3, y_list[3]))
        x_list[3], y_list[3] = inter(x_list[3],y_list[3])
        y_list[3] = list(map(lambda y: y - y_list[3][0], y_list[3]))
    else:
        y_list[3] = list(map(lambda y: y - dis_fn3, y_list[3]))
        x_list[3], y_list[3] = inter(x_list[3],y_list[3])
        y_list[3] = list(map(lambda y: y - y_list[3][0], y_list[3]))

    dis_fn6 = f_bl - y_list[6][0]
    if dis_fn6 > 0:
        y_list[6] = list(map(lambda y: y + dis_fn6, y_list[6]))
        x_list[6], y_list[6] = inter(x_list[6],y_list[6])
        y_list[6] = list(map(lambda y: y - y_list[6][0], y_list[6]))
    else:
        y_list[6] = list(map(lambda y: y - dis_fn6, y_list[6]))

```

```

x_list[6], y_list[6] = inter(x_list[6],y_list[6])
y_list[6] = list(map(lambda y: y - y_list[6][0], y_list[6]))

dis_fn9 = f_bl - y_list[9][0]
if dis_fn9 > 0:
    y_list[9] = list(map(lambda y: y + dis_fn9, y_list[9]))
    x_list[9], y_list[9] = inter(x_list[9],y_list[9])
    y_list[9] = list(map(lambda y: y - y_list[9][0], y_list[9]))
else:
    y_list[9] = list(map(lambda y: y - dis_fn9, y_list[9]))
    x_list[9], y_list[9] = inter(x_list[9],y_list[9])
    y_list[9] = list(map(lambda y: y - y_list[9][0], y_list[9]))

dis_fn12 = f_bl - y_list[12][0]
if dis_fn12 > 0:
    y_list[12] = list(map(lambda y: y + dis_fn12, y_list[12]))
    x_list[12], y_list[12] = inter(x_list[12],y_list[12])
    y_list[12] = list(map(lambda y: y - y_list[12][0], y_list[12]))
else:
    y_list[12] = list(map(lambda y: y - dis_fn12, y_list[12]))
    x_list[12], y_list[12] = inter(x_list[12],y_list[12])
    y_list[12] = list(map(lambda y: y - y_list[12][0], y_list[12]))

## second, fix y value of second row!
dis_fn4 = s_bl - y_list[4][0]
if dis_fn4 > 0:
    y_list[4] = list(map(lambda y: y + dis_fn4, y_list[4]))
    x_list[4], y_list[4] = inter(x_list[4],y_list[4])
    y_list[4] = list(map(lambda y: y - y_list[4][0], y_list[4]))
else:
    y_list[4] = list(map(lambda y: y - dis_fn4, y_list[4]))
    x_list[4], y_list[4] = inter(x_list[4],y_list[4])
    y_list[4] = list(map(lambda y: y - y_list[4][0], y_list[4]))

dis_fn7 = s_bl - y_list[7][0]
if dis_fn7 > 0:
    y_list[7] = list(map(lambda y: y + dis_fn7, y_list[7]))
    x_list[7], y_list[7] = inter(x_list[7],y_list[7])
    y_list[7] = list(map(lambda y: y - y_list[7][0], y_list[7]))
else:
    y_list[7] = list(map(lambda y: y - dis_fn7, y_list[7]))
    x_list[7], y_list[7] = inter(x_list[7],y_list[7])
    y_list[7] = list(map(lambda y: y - y_list[7][0], y_list[7]))

dis_fn10 = s_bl - y_list[10][0]
if dis_fn10 > 0:
    y_list[10] = list(map(lambda y: y + dis_fn10, y_list[10]))
    x_list[10], y_list[10] = inter(x_list[10],y_list[10])

```



```

y_list[10] = list(map(lambda y: y - y_list[10][0], y_list[10]))
else:
y_list[10] = list(map(lambda y: y - dis_fn10, y_list[10]))
x_list[10], y_list[10] = inter(x_list[10], y_list[10])
y_list[10] = list(map(lambda y: y - y_list[10][0], y_list[10]))

dis_fn13 = s_bl - y_list[13][0]
if dis_fn13 > 0:
y_list[13] = list(map(lambda y: y + dis_fn13, y_list[13]))
x_list[13], y_list[13] = inter(x_list[13], y_list[13])
y_list[13] = list(map(lambda y: y - y_list[13][0], y_list[13]))
else:
y_list[13] = list(map(lambda y: y - dis_fn13, y_list[13]))
x_list[13], y_list[13] = inter(x_list[13], y_list[13])
y_list[13] = list(map(lambda y: y - y_list[13][0], y_list[13]))

## thrid, fix y value of third row!
dis_fn5 = t_bl - y_list[5][0]
if dis_fn5 > 0:
y_list[5] = list(map(lambda y: y + dis_fn5, y_list[5]))
x_list[5], y_list[5] = inter(x_list[5], y_list[5])
y_list[5] = list(map(lambda y: y - y_list[5][0], y_list[5]))
else:
y_list[5] = list(map(lambda y: y - dis_fn5, y_list[5]))
x_list[5], y_list[5] = inter(x_list[5], y_list[5])
y_list[5] = list(map(lambda y: y - y_list[5][0], y_list[5]))

dis_fn8 = t_bl - y_list[8][0]
if dis_fn8 > 0:
y_list[8] = list(map(lambda y: y + dis_fn8, y_list[8]))
x_list[8], y_list[8] = inter(x_list[8], y_list[8])
y_list[8] = list(map(lambda y: y - y_list[8][0], y_list[8]))
else:
y_list[8] = list(map(lambda y: y - dis_fn8, y_list[8]))
x_list[8], y_list[8] = inter(x_list[8], y_list[8])
y_list[8] = list(map(lambda y: y - y_list[8][0], y_list[8]))

dis_fn11 = t_bl - y_list[11][0]
if dis_fn11 > 0:
y_list[11] = list(map(lambda y: y + dis_fn11, y_list[11]))
x_list[11], y_list[11] = inter(x_list[11], y_list[11])
y_list[11] = list(map(lambda y: y - y_list[11][0], y_list[11]))
else:
y_list[11] = list(map(lambda y: y - dis_fn11, y_list[11]))
x_list[11], y_list[11] = inter(x_list[11], y_list[11])
y_list[11] = list(map(lambda y: y - y_list[11][0], y_list[11]))

dis_fn14 = t_bl - y_list[14][0]

```

```

if dis_fn14 > 0:
    y_list[14] = list(map(lambda y: y + dis_fn14, y_list[14]))
    x_list[14], y_list[14] = inter(x_list[14],y_list[14])
    y_list[14] = list(map(lambda y: y - y_list[14][0], y_list[14]))
else:
    y_list[14] = list(map(lambda y: y - dis_fn14, y_list[14]))
    x_list[14], y_list[14] = inter(x_list[14],y_list[14])
    y_list[14] = list(map(lambda y: y - y_list[14][0], y_list[14]))

## fourth, fix y value of fourth row!
dis_fn16 = fr_bl - y_list[16][0]
if dis_fn16 > 0:
    y_list[16] = list(map(lambda y: y + dis_fn16, y_list[16]))
    x_list[16], y_list[16] = inter2(x_list[16],y_list[16])
    y_list[16] = list(map(lambda y: y - y_list[16][0], y_list[16]))
else:
    y_list[16] = list(map(lambda y: y - dis_fn16, y_list[16]))
    x_list[16], y_list[16] = inter2(x_list[16],y_list[16])
    y_list[16] = list(map(lambda y: y - y_list[16][0], y_list[16]))

return x_list, y_list

```

#Adjust scale of ECG data!

```

def adj(x_list,y_list):
    candid_1 = y_list[0]
    max_value_1 = max(candid_1)
    min_value_1 = min(candid_1)
    base_1 = abs(max_value_1 - min_value_1)

    y_list[3] = [x/base_1 for x in y_list[3]]
    y_list[6] = [x/base_1 for x in y_list[6]]
    y_list[9] = [x/base_1 for x in y_list[9]]
    y_list[12] = [x/base_1 for x in y_list[12]]

    candid_2 = y_list[1]
    max_value_2 = max(candid_2)
    min_value_2 = min(candid_2)
    base_2 = abs(max_value_2 - min_value_2)

    y_list[4] = [x/base_2 for x in y_list[4]]
    y_list[7] = [x/base_2 for x in y_list[7]]
    y_list[10] = [x/base_2 for x in y_list[10]]
    y_list[13] = [x/base_2 for x in y_list[13]]

    candid_3 = y_list[2]
    max_value_3 = max(candid_3)
    min_value_3 = min(candid_3)

```

```

base_3 = abs(max_value_3 - min_value_3)

y_list[5] = [x/base_3 for x in y_list[5]]
y_list[8] = [x/base_3 for x in y_list[8]]
y_list[11] = [x/base_3 for x in y_list[11]]
y_list[14] = [x/base_3 for x in y_list[14]]

candid_4 = y_list[15]
max_value_4 = max(candid_4)
min_value_4 = min(candid_4)
base_4 = abs(max_value_4 - min_value_4)

y_list[15] = [x/base_4 for x in y_list[15]]

return x_list, y_list

#make each dataframe for each part of ECG!
def mk_pECG(x_list,y_list):
    p_df_3 = pd.DataFrame(y_list[3])
    p_df_4 = pd.DataFrame(y_list[4])
    p_df_5 = pd.DataFrame(y_list[5])
    p_df_6 = pd.DataFrame(y_list[6])
    p_df_7 = pd.DataFrame(y_list[7])
    p_df_8 = pd.DataFrame(y_list[8])
    p_df_9 = pd.DataFrame(y_list[9])
    p_df_10 = pd.DataFrame(y_list[10])
    p_df_11 = pd.DataFrame(y_list[11])
    p_df_12 = pd.DataFrame(y_list[12])
    p_df_13 = pd.DataFrame(y_list[13])
    p_df_14 = pd.DataFrame(y_list[14])
    p_df_16 = pd.DataFrame(y_list[16])

    return p_df_3, p_df_4, p_df_5, p_df_6, p_df_7, p_df_8, p_df_9, p_df_10, p_df_11, p_df_12, p_df_13, p_df_14, p_df_16

def execute(file):
    try:
        #first, change file to data list of ECG!
        pth_tmp = pars_info(file)
        lst_tmp = chang_corr(pth_tmp)
        x_list, y_list = corrd2data(lst_tmp)
        x_list, y_list = fix_data(x_list, y_list)
        x_list, y_list = adj(x_list, y_list)

        #second, parsing filename and change saving filename!
        name = str(file)

```

```

p_id= gt_id(name)
date = gt_date(name)
time = gt_time(name)
endnum = gt_endnum(name)

###third, make subfolder for each patient!
os.getcwd()

try:
    # 1)subfolder each patient_id!
    os.chdir("/directory/csv")
    os.mkdir(p_id)

except OSError:
    os.chdir("/directory/csv"+"/"+p_id)

try:
    os.mkdir(date)
    os.chdir("/directory/csv"+"/"+p_id+"/"+date)

except OSError:
    os.chdir("/directory/csv"+"/"+p_id+"/"+date)

    p_df_3,p_df_4,p_df_5, p_df_6,p_df_7,p_df_8,p_df_9, p_df_10,p_df_11,p_df_12,p_df_13,p_df_14, p_df_16 = mk_
pECG(x_list,y_list)

#change to csv file for each part_ECG!
p_df_3.to_csv(date + time + "_" + date + str(int(time)+3)+ "_" + "ECGI" + ".gz",index=False,header=False,compression='
gzip')
p_df_4.to_csv(date + time + "_" + date + str(int(time)+3)+ "_" + "ECGII" + ".gz",index=False,header=False,compression=
'gzip')
p_df_5.to_csv(date + time + "_" + date + str(int(time)+3)+ "_" + "ECGIII" + ".gz",index=False,header=False,compression
='gzip')
p_df_6.to_csv(date + time + "_" + date + str(int(time)+3)+ "_" + "ECGaVR" + ".gz",index=False,header=False,compressio
n='gzip')
p_df_7.to_csv(date + time + "_" + date + str(int(time)+3)+ "_" + "ECGaVL" + ".gz",index=False,header=False,compressio
n='gzip')
p_df_8.to_csv(date + time + "_" + date + str(int(time)+3)+ "_" + "ECGaVF" + ".gz",index=False,header=False,compressio
n='gzip')
p_df_9.to_csv(date + time + "_" + date + str(int(time)+3)+ "_" + "ECGV1" + ".gz",index=False,header=False,compression
='gzip')
p_df_10.to_csv(date + time + "_" + date + str(int(time)+3)+ "_" + "ECGV2" + ".gz",index=False,header=False,compressio
n='gzip')
p_df_11.to_csv(date + time + "_" + date + str(int(time)+3)+ "_" + "ECGV3" + ".gz",index=False,header=False,compressio
n='gzip')
p_df_12.to_csv(date + time + "_" + date + str(int(time)+3)+ "_" + "ECGV4" + ".gz",index=False,header=False,compressio
n='gzip')
p_df_13.to_csv(date + time + "_" + date + str(int(time)+3)+ "_" + "ECGV5" + ".gz",index=False,header=False,compressio

```

```

n='gzip')
    p_df_14.to_csv(date + time + "_" + date + str(int(time)+3) + "_" + "ECGV6" + ".gz",index=False,header=False,compression=
n='gzip')
    p_df_16.to_csv(date + time + "_" + date + str(int(time)+10) + "_" + "ECGII" + ".gz",index=False,header=False,compression=
n='gzip')

    else:

        p_df_3,p_df_4,p_df_5, p_df_6,p_df_7,p_df_8,p_df_9, p_df_10,p_df_11,p_df_12,p_df_13,p_df_14, p_df_16 = mk_
pECG(x_list,y_list)

        #change to csv file for each part_ECG!
        p_df_3.to_csv(date + time + "_" + date + str(int(time)+3) + "_" + "ECGI" + ".gz",index=False,header=False,compression='
gzip')
        p_df_4.to_csv(date + time + "_" + date + str(int(time)+3) + "_" + "ECGII" + ".gz",index=False,header=False,compression=
'gzip')

#exception handling
except IndexError:
    print(file)
    os.system("mv /directory/svg/"+file+" /directory/unusual_svg/")
    None

if __name__ == '__main__':
    print("Start converting ECG data!")

    os.chdir("/directory/")
    search_directory = "svg"
    filelist = listdir(search_directory)

    os.chdir("/directory/svg")
    print("Number_of_svg_file :",len(filelist))
    processor = cpu_count()
    pool = Pool(processes = cpu_count())
    print("Number of processor:",processor)
    startTime = int(time.time())

    pool.map(execute, filelist)

    endTime = int(time.time())
    print("Total converting time", (endTime - startTime))

```

#### 4. xml2data.py

A code converts the XML file into a CSV file containing alphanumeric data.

Input: XML file.

Output: The alphanumeric data contained in the XML file is classified according to the item and stored in a CSV file

```
### This code is for converting XML to data(alphanumeric)
```

```
## Module import (for parsing and multiprocessing)
```

```
from multiprocessing import Process
```

```
from multiprocessing import Pool, cpu_count
```

```
import multiprocessing
```

```
import xml.etree.cElementTree as ET
```

```
from itertools import chain
```

```
from collections import defaultdict
```

```
import pandas as pd
```

```
from os import listdir
```

```
import re
```

```
import time
```

```
import os
```

```
import signal
```

```
import numpy as np
```

```
import sys
```

```
### Define functions for converting
```

```
## Parsing and collect element in XML file!
```

```
def par_elem(i):
```

```
    tree = ET.ElementTree(file = i)
```

```
    inf = []
```

```
    for elem in tree.iter():
```

```
        elem.attrib['text'] = elem.text
```

```
        y = [elem.attrib]
```

```
        inf = inf + y
```

```
    inf_tmp = inf[4:-2]
```

```
    return inf_tmp,i
```

```
def par_elem_2(i):
```

```
    tree = ET.ElementTree(file = i)
```

```
    inf = []
```

```
    for elem in tree.iter():
```

```
        x = [[elem.tag, elem.attrib, elem.text]]
```

```
        inf = inf + x
```

```
    inf_tmp_2 = inf[4:-2]
```

```
    return inf_tmp_2
```

```
#Collect element of XML file by each row!
```

```

def col_elem(inf_tmp,filename):
    all_dict_2 = []
    all_dict = []
    for n in inf_tmp:
        top_info = n['top']
        text_info = n['text']
        left_info = n['left']

        dic_tmp = {top_info : text_info}
        dic_tmp_2 = {left_info : text_info}

        dic_tmp = [dic_tmp]
        dic_tmp_2 = [dic_tmp_2]

        all_dict = all_dict + dic_tmp
        all_dict_2 = all_dict_2 + dic_tmp_2

        dic_tmp =[]
        dic_tmp_2 =[]

        super_dict = defaultdict(set)

        for d in all_dict:
            for k, v in d.items():
                super_dict[k].add(v)

    r_40 = super_dict['40']
    l_40 = list(r_40)
    r_67 = super_dict['67']
    l_67 = list(r_67)
    r_81 = super_dict['81']
    l_81 = list(r_81)
    r_94 = super_dict['94']
    l_94 = list(r_94)
    r_95 = super_dict['95']
    l_95 = list(r_95)
    r_108 = super_dict['108']
    l_108 = list(r_108)
    r_109 = super_dict['109']
    l_109 = list(r_109)
    r_122 = super_dict['122']
    l_122 = list(r_122)
    r_123 = super_dict['123']
    l_123 = list(r_123)

    return l_40,l_67, l_81, l_94,l_95,l_108,l_109,l_122,l_123

```

```

#Find suitable value in elements!
def find_values(l_40, l_67, l_81, l_94, l_95, l_108, l_109, l_122, l_123):
    #Use regex
    pattern1 = r'\d+-\w+-\d+ \d\d:\d\d:\d\d'
    pattern2 = r'\d+'
    pattern3 = r'\d+/\d+'
    pattern4 = r'\w+, \w+'

    ##'40' row!
    # 1)patient ID!
    p_id = [ x for x in l_40 if "ID" in x ]
    if len(p_id) > 1:
        p_id = [ x for x in p_id if "ID:" in x ]
    p_id = ".join(p_id).replace('ID:',")
    # 2)Patient name!
    p_name = [ x for x in l_40 if re.findall(pattern4, x)]
    p_name = ".join(p_name)
    # 3)Hospital name!
    hp_name = [ x for x in l_40 if "AJOU" in x ]
    hp_name = ".join(hp_name)
    # 4)Date!
    date = [ x for x in l_40 if re.findall(pattern1, x)]
    date = ".join(date)

    ##'67' row!
    # 1)Patient Age!
    p_yr = [ x for x in l_67 if 'yr' in x ]
    p_yr = ".join(p_yr)
    p_yr = re.sub(r'\d+-\w+-\d+',",",p_yr)
    p_yr = p_yr.replace('(',').replace(')',').replace('yr,')
    # 2)Vent.rate!
    vr_u = [ x for x in l_67 if 'BPM' in x ]
    vr_vl = [ x for x in l_67 if re.findall(pattern2, x) ]
    vr_vl = [ x for x in vr_vl if "yr" not in x ]
    vr_vl = [ x for x in vr_vl if "inus" not in x ]
    vr_vl = [ x for x in vr_vl if "bradycardia" not in x ]
    vr_vl = [ x for x in vr_vl if "Atrial " not in x ]
    vr_vl = [ x for x in vr_vl if "atrial" not in x ]
    vr_vl = [ x for x in vr_vl if "Mon" not in x ]
    vr_vl = [ x for x in vr_vl if "mon" not in x ]
    vr_vl = [ x for x in vr_vl if "days" not in x ]
    vr_vl = [ x for x in vr_vl if "complexes" not in x ]
    vr_vl = [ x for x in vr_vl if "ATRIAL" not in x ]
    vr_vl = [ x for x in vr_vl if "Unusual" not in x ]
    vr_vl = [ x for x in vr_vl if "-" not in x ]
    vr_vl = [ x for x in vr_vl if "AV BLOCK" not in x ]

```



```

vr_vl = [ x for x in vr_vl if "AV" not in x ]
vr_vl = [ x for x in vr_vl if "inversion" not in x ]
vr_vl = [ x for x in vr_vl if "ECG" not in x ]
vr_vl = [ x for x in vr_vl if "RATIO" not in x ]
vr_vl = [ x for x in vr_vl if "hrs" not in x ]
vr_vl = [ x for x in vr_vl if "wks" not in x ]
vr_vl = [ x for x in vr_vl if "LEAD" not in x ]
vr_vl = [ x for x in vr_vl if "*" not in x ]
vr_vl = [ x for x in vr_vl if "waves" not in x ]
vr_vl = [ x for x in vr_vl if "CHO" not in x ]
vr_vl = [ x for x in vr_vl if "GX" not in x ]
vr_vl = [ x for x in vr_vl if "$" not in x ]
vr_vl = [ x for x in vr_vl if "SINUS" not in x ]
vr_vl = [ x for x in vr_vl if "LEADS" not in x ]
vent_rate = vr_vl
if len(vent_rate) > 1:
    vent_rate = vent_rate[1]
vent_rate = ".join(vent_rate)
# 3)Diagnosis in first row!
dia1 = [item for item in l_67 if len(item)>=9]
dia1 = [ x for x in dia1 if "Vent" not in x ]
dia1 = [ x for x in dia1 if "yr" not in x ]
dia1 = [x for x in dia1 if "Confirmed by" not in x]
dia1 = [x for x in dia1 if "Reconfirmed by" not in x]

##'81' row!
# 1)Sex of patient
p_sex = [ x for x in l_81 if 'ale' in x ]
p_sex = ".join(p_sex)
# 2)ethnicity of patient
p_eth = [ x for x in l_81 if 'Oriental' in x ]
p_eth_2 = [ x for x in l_81 if 'Asian' in x ]
p_ethn = p_eth + p_eth_2
p_ethn = ".join(p_ethn)
# 3)PR interval
pr_i_u = [ x for x in l_81 if 'ms' in x ]
pr_i_vl = [ x for x in l_81 if re.findall(pattern2, x)]
pr_i_vl = [ x for x in pr_i_vl if "RSR" or "QR pattern " not in x ]
pr_i_vl = [ x for x in pr_i_vl if "Atrial" not in x ]
pr_i_vl = [ x for x in pr_i_vl if "ATRIAL" not in x ]
pr_i_vl = [ x for x in pr_i_vl if "atrial" not in x ]
pr_i_vl = [ x for x in pr_i_vl if "Increased" not in x ]
pr_i_vl = [ x for x in pr_i_vl if "R/S" not in x ]
pr_i_vl = [ x for x in pr_i_vl if "Sinus" not in x ]
pr_i_vl = [ x for x in pr_i_vl if "sinus" not in x ]
pr_i_vl = [ x for x in pr_i_vl if "rhythm" not in x ]

```

```

pr_i_vl = [ x for x in pr_i_vl if "bundle" not in x ]
pr_i_vl = [ x for x in pr_i_vl if "branch" not in x ]
pr_i_vl = [ x for x in pr_i_vl if "because" not in x ]
pr_i_vl = [ x for x in pr_i_vl if "and" not in x ]
pr_i_vl = [ x for x in pr_i_vl if "by" not in x ]
pr_i_vl = [ x for x in pr_i_vl if "RSR" not in x ]
pr_i_vl = [ x for x in pr_i_vl if "-" not in x ]
pr_i_vl = [ x for x in pr_i_vl if "AV" not in x ]
pr_i_vl = [ x for x in pr_i_vl if "mon" not in x ]
pr_i_vl = [ x for x in pr_i_vl if "RATIO" not in x ]
pr_i_vl = [ x for x in pr_i_vl if "QTc" not in x ]
pr_i_vl = [ x for x in pr_i_vl if "QT" not in x ]
pr_i_vl = [ x for x in pr_i_vl if "ms" not in x ]
pr_i_vl = [ x for x in pr_i_vl if "r/s" not in x ]
pr_i_vl = [ x for x in pr_i_vl if "CONSIDER" not in x ]
pr_i_vl = [ x for x in pr_i_vl if "ventricular" not in x ]
pr_i_vl = [ x for x in pr_i_vl if "RATIO" not in x ]
pr_i_vl = [ x for x in pr_i_vl if "EARLY" not in x ]
pr_i_vl = [ x for x in pr_i_vl if "PROBABLE" not in x ]
pr_i_vl = [ x for x in pr_i_vl if "LEAD" not in x ]
pr_interval = pr_i_vl
pr_interval = ".join(pr_interval)
# 4)Diagnosis in second row!
dia2 = [item for item in l_81 if len(item)>=9]
dia2 = [ x for x in dia2 if "interval" not in x ]
dia2 = [x for x in dia2 if "Confirmed by" not in x]
dia2 = [x for x in dia2 if "Reconfirmed by" not in x]

```

##'94' row!

# 1)Patient Height & Weight

```

p_heigt = [ x for x in l_94 if 'cm' in x ]
p_weight = [ x for x in l_94 if 'kg' in x ]
p_heigt = ".join(p_heigt)
p_weight = ".join(p_weight)
p_heigt = str(p_heigt)
p_weight = str(p_weight)
p_heigt = p_heigt.replace('cm','')
p_weight = p_weight.replace('kg','')

```

# 2)QRS duration

```

qrs_d_u = [ x for x in l_94 if 'ms' in x ]
qrs_d_vl = [ x for x in l_94 if re.findall(pattern2, x)]
qrs_d_vl = [ x for x in qrs_d_vl if "cm" not in x ]
qrs_d_vl = [ x for x in qrs_d_vl if "kg" not in x ]
qrs_duration = qrs_d_vl
qrs_duration = ".join(qrs_duration)

```

# 3)Diagnosis in third row!

```

dia3 = [item for item in l_94 if len(item)>=9]
dia3 = [ x for x in dia3 if "duration" not in x ]
dia3 = [x for x in dia3 if "Confirmed by" not in x]
dia3 = [x for x in dia3 if "Reconfirmed by" not in x]

## top='95' row!(this row is unusual row for diagnosis information)
dia4 = [item for item in l_95 if len(item)>=10]
dia4 = [x for x in dia4 if "Confirmed by" not in x]
dia4 = [x for x in dia4 if "Reconfirmed by" not in x]

##'108' row!
# 1)QT/QTc
qtqc_u = [ x for x in l_108 if 'ms' in x ]
qtqc_vl = [ x for x in l_108 if re.findall(pattern3, x)]
qtqc_vl_tmp = ".join(qtqc_vl)
qt_vl = [i.split('/', 1)[0] for i in qtqc_vl]
qtc_vl = [i.split('/', 1)[1] for i in qtqc_vl]
qt = qt_vl
qtc = qtc_vl
qt = ".join(qt)
qtc = ".join(qtc)
# 2)Room information
room_info = [ x for x in l_108 if 'Room' in x ]
room_info = ".join(room_info).replace('Room:;')
# 3)Diagnosis in fourth row!
dia5 = [item for item in l_108 if len(item)>=9]
dia5 = [ x for x in dia5 if "Room" not in x ]
dia5 = [x for x in dia5 if "Confirmed by" not in x]
dia5 = [x for x in dia5 if "Reconfirmed by" not in x]

##'109' row!(this row also unusual row for diagnosis information)
dia6 = [item for item in l_109 if len(item)>=10]
dia6 = [x for x in dia6 if "Confirmed by" not in x]
dia6 = [x for x in dia6 if "Reconfirmed by" not in x]

##'122' row!
# 1)Location information
loc_info = [ x for x in l_122 if "Loc" in x ]
loc_info = ".join(loc_info).replace('Loc:;')
# 2) Diagnosis information in fifth row!
dia7 = [item for item in l_122 if len(item)>=9]
dia7 = [ x for x in dia7 if "P-R-T" not in x ]
dia7 = [x for x in dia7 if "Confirmed by" not in x]
dia7 = [x for x in dia7 if "Reconfirmed by" not in x]

```

```

##'123' row!(This row also unusual row for Diagnosis information!)
dia8 = [item for item in l_123 if len(item)>=9]
dia8 = [x for x in dia8 if "Confirmed by" not in x]
dia8 = [x for x in dia8 if "Reconfirmed by" not in x]

## Collect Diagnosis information!
diag = dia1+dia2+dia3+dia4+dia5+dia6+dia7+dia8
diag = ','.join(diag)

return p_id, date,p_ethn, p_yr, p_heigt,p_weight, vent_rate, p_sex, pr_interval, qrs_duration, qt, qtc, room_info, loc_info,
diag, qtqc_vl_tmp

#Find P-R-T axes value!
def find_prt(inf_tmp_2,qtqc_vl_tmp):
    init_index = 0
    initial_index = 0
    tmp = []
    for n in inf_tmp_2:
        n[0]="
        n[1]="
        tmp = tmp + [n]
        n=[]

    for i,j in enumerate(tmp):
        if j[2] == 'P-R-T axes':
            final_index = i
        elif j[2] == qtqc_vl_tmp:
            init_index = init_index + i
            initial_index = initial_index + init_index + 1
        else:
            pass

    prt_tmp = tmp[initial_index : final_index]
    p_axes = list(prt_tmp[2][2])
    p_axes = [ x for x in p_axes if "*" not in x ]
    if len(p_axes) > 3:
        p_axes = []

    p_axes = ','.join(p_axes)
    r_axes = list(prt_tmp[1][2])
    r_axes = [ x for x in r_axes if "*" not in x ]
    if len(r_axes) > 3:
        r_axes = []

```

```

r_axes = ".join(r_axes)
t_axes = list(prt_tmp[0][2])
t_axes = [ x for x in t_axes if "*" not in x ]
t_axes = [ x for x in t_axes if "sinus" not in x ]
if len(t_axes) > 3:
    t_axes = []

t_axes = ".join(t_axes)

return p_axes, r_axes, t_axes

def execute(filelist):
    os.chdir("/directory/xml")
    try:
        inf_tmp, filename = par_elem(filelist)
        inf_tmp_2 = par_elem_2(filelist)

        l_40,l_67, l_81, l_94,l_95,l_108,l_109,l_122,l_123 = col_elem(inf_tmp,filename)

        p_id, date, p_ethn,p_yr, p_heigt,p_weight, p_sex, vent_rate, pr_interval, qrs_duration, qt, qtc, room_info, loc_info, diag,
        qtqtc_vl_tmp = find_values(l_40,l_67, l_81, l_94,l_95,l_108,l_109,l_122,l_123)

        p_axes, r_axes, t_axes = fnd_prt(inf_tmp_2, qtqtc_vl_tmp)

        dt_lst = [p_id,date,p_ethn,p_yr,p_heigt,p_weight,vent_rate,p_sex,pr_interval,qrs_duration,qt, qtc, room_info, loc_info, p_
        axes, r_axes,t_axes,diag]

        dt_lst = pd.DataFrame([dt_lst])

        return dt_lst

    except KeyError :
        print(filename)
        os.system("mv /directory/xml/" + filename + " /directory/unusual_xml/")
        return None

def main(filelist):
    processor = cpu_count()
    proc = os.getpid()

    print("proc_id",proc)
    print(os.fork())
    pool = Pool(processes = cpu_count())
    print("Number of processor:",processor)
    startTime = int(time.time())

```

```

counter = 0

dt_tmp = pool.map(execute,filelist)

if dt_tmp is not None :
    df_tmp =pd.DataFrame({"Patient_info":["Patient_ID","Date","Ethnicity","Age(yr)","Height(cm)","Weight(kg)","Sex","Vent.
rate(BPM)","PR_interval(ms)","QRS_duration(ms)", "QC(ms)","QTc(ms)","Room","Location number","P_axes","R_axes","T_
axes","Diagnosis"]})

    df_tmp = df_tmp.T

df = pd.concat(dt_tmp)

df_tmp = pd.concat([df_tmp, df], axis=0,ignore_index=True)
os.chdir("/directory/text/")
df_tmp.to_csv("Result.txt",header=None, index=None,sep=',',encoding='utf-8')
df_tmp.to_csv("Result.csv",encoding='utf-8')
print("Complete")

endTime = int(time.time())
print("Total converting time", (endTime - startTime))

if __name__ == "__main__":
    print("Start extract ECG text data!")

    os.chdir("/directory/")
    search_directory = "xml"
    filelist = listdir(search_directory)
    main(filelist)

```
